# Supplementary material for: Novel insights into Notum and glypicans regulation in colorectal cancer
Source: PubMed Central journal article supplement (PMC4747403; doi:10.18632/oncotarget.5652), 2015-10-20
Supplement: oncotarget-06-41237-s001.pdf [file oncotarget-06-41237-s001.pdf]

## SUPPLEMENTARY TABLE

**Supplementary Table S2: Genes involved in the top 2 significantly dysregulated pathways**

| Canonical pathway                                      | Entrez Gene ID | Symbol    | Entrez Gene Name                                   | Log Ratio | p-value  |
|--------------------------------------------------------|----------------|-----------|----------------------------------------------------|-----------|----------|
| LPS/IL-1-mediated inhibition of RXR function signaling | 17082          | IL1RL1    | interleukin 1 receptor-like 1                      | 4.748     | 1.07E-21 |
|                                                        | 18383          | TNFRSF11B | tumor necrosis factor receptor superfamily, 11b    | 3.684     | 1.51E-16 |
|                                                        | 11425          | APOC4     | apolipoprotein C-IV                                | 2.907     | 1.27E-05 |
|                                                        | 239273         | ABCC4     | ATP-binding cassette, sub-family C (CFTR/ MRP), 4  | 2.716     | 2.63E-15 |
|                                                        | 228608         | SMOX      | spermine oxidase                                   | 2.091     | 2.51E-13 |
|                                                        | 16176          | IL1B      | interleukin 1 beta                                 | 1.779     | 1.23E-06 |
|                                                        | 214579         | ALDH5A1   | aldehyde dehydrogenase 5 family, member A1         | 1.580     | 8.03E-13 |
|                                                        | 14859          | GSTA3     | glutathione S-transferase alpha 3                  | 1.438     | 1.68E-04 |
|                                                        | 68312          | GSTM2     | glutathione S-transferase mu 2 (muscle)            | 1.386     | 9.99E-11 |
|                                                        | 13088          | CYP2B6    | cytochrome P450, family 2, subfamily B, polypep. 6 | 1.369     | 1.40E-09 |
|                                                        | 12780          | ABCC2     | ATP-binding cassette, sub-family C (CFTR/ MRP), 2  | 1.240     | 4.39E-12 |
|                                                        | 56454          | ALDH18A1  | aldehyde dehydrogenase 18 family, member A1        | 1.161     | 1.14E-09 |
|                                                        | 11816          | APOE      | apolipoprotein E                                   | 1.120     | 5.01E-03 |
|                                                        | 15478          | HS3ST3A1  | heparan sulfate 3-O-sulfotransferase 3A1           | 1.090     | 3.85E-06 |
|                                                        | 16476          | JUN       | jun proto-oncogene                                 | 1.053     | 9.34E-07 |
|                                                        | 21926          | TNF       | tumor necrosis factor                              | 1.025     | 9.24E-08 |
|                                                        | 50790          | ACSL4     | acyl-CoA synthetase long-chain family member 4     | 1.019     | 1.65E-11 |
|                                                        | 72082          | CYP2C9    | cytochrome P450, family 2, subfamily C, polypep. 9 | -3.902    | 6.66E-12 |
|                                                        | 53315          | Sult1d1   | sulfotransferase family 1D, member 1               | -3.123    | 1.28E-14 |
|                                                        | 27409          | ABCG5     | ATP-binding cassette, sub-family G (WHITE), 5      | -2.625    | 5.88E-10 |
|                                                        | 109731         | MAOB      | monoamine oxidase B                                | -2.527    | 3.72E-11 |
|                                                        | 69083          | SULT1C2   | sulfotransferase family, cytosolic, 1C, member 2   | -2.358    | 5.79E-10 |

(Continued)

| Canonical pathway               | Entrez Gene ID | Symbol   | Entrez Gene Name                                             | Log Ratio | p-value  |
|---------------------------------|----------------|----------|--------------------------------------------------------------|-----------|----------|
|                                 | 16173          | IL18     | interleukin 18 (interferon-gamma-inducing factor)            | -2.246    | 1.86E-10 |
|                                 | 20186          | NR1H4    | nuclear receptor subfamily 1, group H, member 4              | -2.229    | 8.93E-11 |
|                                 | 19017          | PPARGC1A | peroxisome proliferator-activated receptor gamma, 1 $\alpha$ | -2.160    | 4.28E-09 |
|                                 | 381334         | GAL3ST2  | galactose-3-O-sulfotransferase 2                             | -2.145    | 3.47E-13 |
|                                 | 170826         | PPARGC1B | peroxisome proliferator-activated receptor gamma, 1 $\beta$  | -2.008    | 2.21E-11 |
|                                 | 67470          | ABCG8    | ATP-binding cassette, sub-family G (WHITE), 8                | -1.835    | 1.25E-06 |
|                                 | 26424          | NR5A2    | nuclear receptor subfamily 5, group A, member 2              | -1.673    | 6.36E-11 |
|                                 | 66447          | MGST3    | microsomal glutathione S-transferase 3                       | -1.460    | 5.90E-08 |
|                                 | 14871          | GSTT1    | glutathione S-transferase theta 1                            | -1.430    | 1.35E-11 |
|                                 | 56615          | MGST1    | microsomal glutathione S-transferase 1                       | -1.420    | 1.88E-08 |
|                                 | 76408          | ABCC3    | ATP-binding cassette, sub-family C (CFTR/MRP), 3             | -1.416    | 1.99E-10 |
|                                 | 18171          | NR1I2    | nuclear receptor subfamily 1, group I, member 2              | -1.382    | 2.59E-10 |
|                                 | 74205          | ACSL3    | acyl-CoA synthetase long-chain family member 3               | -1.279    | 2.81E-07 |
|                                 | 11812          | APOC1    | apolipoprotein C-I                                           | -1.193    | 4.35E-02 |
|                                 | 54200          | SULT2B1  | sulfotransferase family, cytosolic, 2B, member 1             | -1.189    | 2.23E-09 |
|                                 | 104776         | ALDH6A1  | aldehyde dehydrogenase 6 family, member A1                   | -1.062    | 1.09E-06 |
|                                 | 12359          | CAT      | catalase                                                     | -1.031    | 3.16E-07 |
| Wnt/ $\beta$ -catenin signaling | 12006          | AXIN2    | axin 2                                                       | 4.159     | 1.37E-15 |
|                                 | 20677          | SOX4     | SRY (sex determining region Y)-box 4                         | 3.478     | 1.75E-14 |
|                                 | 12443          | CCND1    | cyclin D1                                                    | 3.134     | 1.45E-15 |
|                                 | 22420          | WNT6     | wingless-type MMTV integration site family, 6                | 3.058     | 3.77E-17 |
|                                 | 20671          | SOX17    | SRY (sex determining region Y)-box 17                        | 2.794     | 1.39E-14 |
|                                 | 24117          | WIF1     | WNT inhibitory factor 1                                      | 2.719     | 2.99E-15 |
|                                 | 12505          | CD44     | CD44 molecule (Indian blood group)                           | 2.661     | 2.70E-15 |
|                                 | 93897          | FZD10    | frizzled family receptor 10                                  | 2.604     | 1.63E-11 |

(Continued)

| Canonical pathway | Entrez Gene ID | Symbol  | Entrez Gene Name                                         | Log Ratio | p-value  |
|-------------------|----------------|---------|----------------------------------------------------------|-----------|----------|
|                   | 22409          | WNT10A  | wingless-type MMTV integration site family, 10A          | 2.538     | 1.34E-15 |
|                   | 50781          | DKK3    | dickkopf 3 homolog (Xenopus laevis)                      | 2.325     | 1.99E-11 |
|                   | 21413          | TCF4    | transcription factor 4                                   | 2.259     | 2.38E-15 |
|                   | 21885          | TLE1    | transducin-like enhancer of split 1                      | 1.842     | 6.60E-14 |
|                   | 218772         | RARB    | retinoic acid receptor, beta                             | 1.737     | 1.12E-11 |
|                   | 104318         | CSNK1D  | casein kinase 1, delta                                   | 1.637     | 3.20E-08 |
|                   | 14609          | GJA1    | gap junction protein, alpha 1, 43kDa                     | 1.591     | 4.52E-09 |
|                   | 20682          | SOX9    | SRY (Sex Determining Region Y)-Box 9                     | 1.572     | 2.16E-07 |
|                   | 27373          | CSNK1E  | casein kinase 1, epsilon                                 | 1.542     | 2.36E-09 |
|                   | 20672          | SOX18   | SRY (sex determining region Y)-box 18                    | 1.228     | 8.97E-07 |
|                   | 22059          | TP53    | tumor protein p53                                        | 1.185     | 3.56E-07 |
|                   | 18099          | NLK     | nemo-like kinase                                         | 1.157     | 1.06E-08 |
|                   | 20667          | SOX12   | SRY (sex determining region Y)-box 12                    | 1.118     | 4.51E-09 |
|                   | 22418          | WNT5A   | wingless-type MMTV integration site family, 5A           | 1.098     | 1.82E-06 |
|                   | 16476          | JUN     | jun proto-oncogene                                       | 1.053     | 9.34E-07 |
|                   | 20377          | SFRP1   | secreted frizzled-related protein 1                      | -1.997    | 1.11E-07 |
|                   | 24108          | UBD     | ubiquitin D                                              | -1.727    | 1.08E-09 |
|                   | 26424          | NR5A2   | nuclear receptor subfamily 5, group A, member 2          | -1.673    | 6.36E-11 |
|                   | 14367          | FZD5    | frizzled family receptor 5                               | -1.529    | 2.83E-10 |
|                   | 21416          | TCF7L2  | transcription factor 7-like 2 (T-cell specific, HMG-box) | -1.060    | 1.38E-09 |
|                   | 21814          | TGFBR3  | transforming growth factor, beta receptor III            | -1.048    | 8.64E-06 |
|                   | 226849         | PPP2R5A | protein phosphatase 2, regulatory subunit B', alpha      | -1.011    | 5.03E-10 |
